# Supplementary material for: In Situ N, O-Dually Doped Nanoporous Biochar Derived from Waste Eutrophic Spirulina for High-Performance Supercapacitors
Source: MDPI journal article supplement (doi:10.3390/nano13172431), 2023-08-27
Supplement: s1 [file s1]

# Supporting Information

## In Situ N, O-Dually Doped Nanoporous Biochar Derived from Waste Eutrophic *Spirulina* for High-Performance Supercapacitors

Yihao Geng <sup>1</sup>, Jieni Wang <sup>1,2</sup>, Xuanyu Chen <sup>1</sup>, Qizhao Wang <sup>1</sup>, Shuqin Zhang <sup>1,2</sup>, Yijun Tian <sup>1,2</sup>, Chenxiao Liu <sup>1,2</sup>, Lin Wang <sup>1</sup>, Zhangdong Wei <sup>1</sup>, Leichang Cao <sup>1,2,\*</sup>, Jinglai Zhang <sup>2</sup> and Shicheng Zhang <sup>3</sup>

<sup>1</sup> Miami College, Henan University, Kaifeng 475004, China; gyh618@henu.edu.cn (Y.G.); jieniwan@126.com (J.W.); xuanyuchen@henu.edu.cn (X.C.); 17367066458@163.com (Q.W.); zhangshuqin@henu.edu.cn (S.Z.); 104753200976@henu.deu.cn (Y.T.); lcxxyyx@henu.edu.cn (C.L.); wanglin@henu.edu.cn (L.W.); 15565139820@163.com (Z.W.)

<sup>2</sup> College of Chemistry and Molecular Sciences, Henan University, Kaifeng 475004, China; zhangjinglai@henu.edu.cn

<sup>3</sup> Shanghai Key Laboratory of Atmospheric Particle Pollution and Prevention (LAP3), Department of Environmental Science and Engineering, Fudan University, Shanghai 200433, China; zhangsc@fudan.edu.cn

\* Correspondence: clch666@henu.edu.cn

**Number of Pages:** 7

**Number of Figures:** 5

**Number of Table:** 2

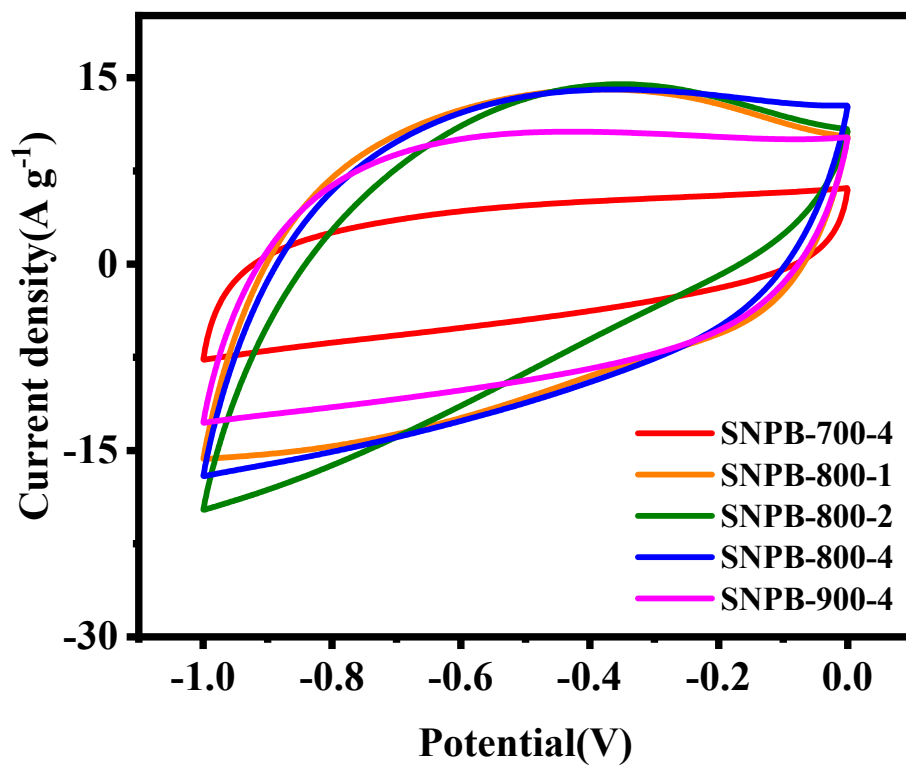

Figure S1. CV curves of SNPBs at  $50 \text{ mV s}^{-1}$  scanning rate.

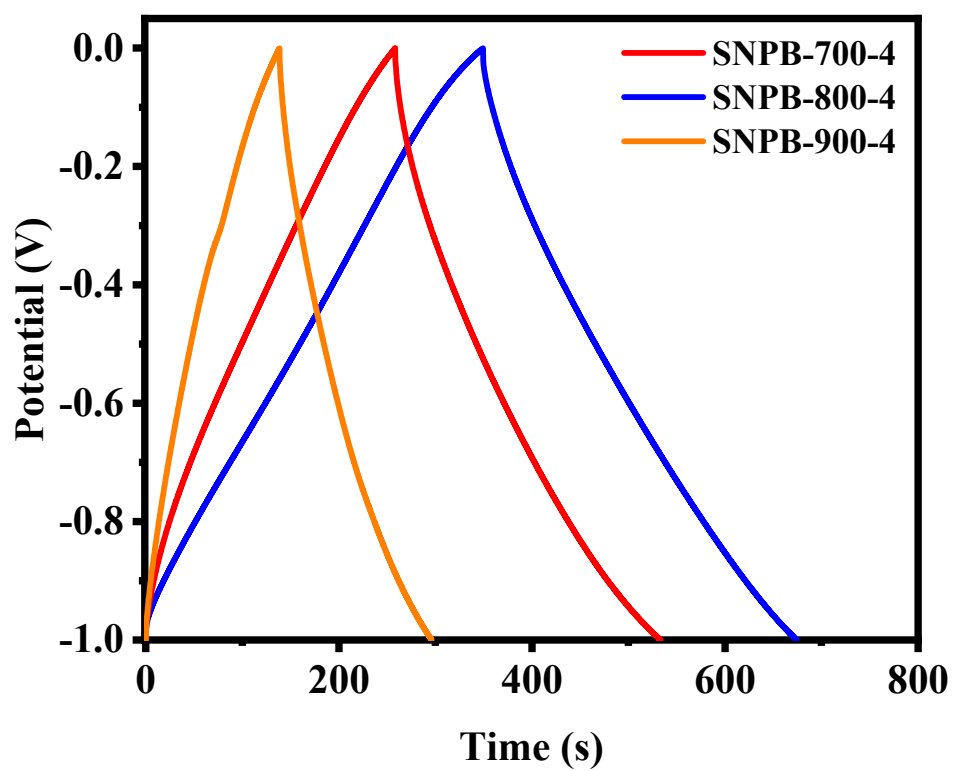

Figure S2. GCD curves of SNPB-X-4 at a current density of  $1\text{A g}^{-1}$ .

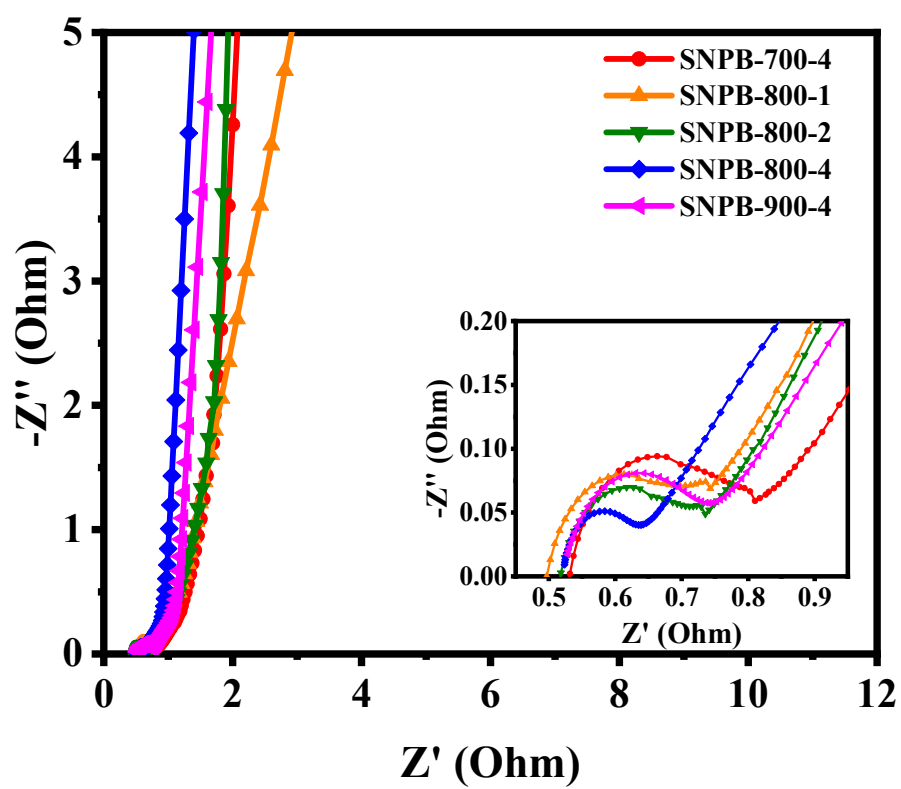

Figure S3. Nyquist plots of SNPBs.

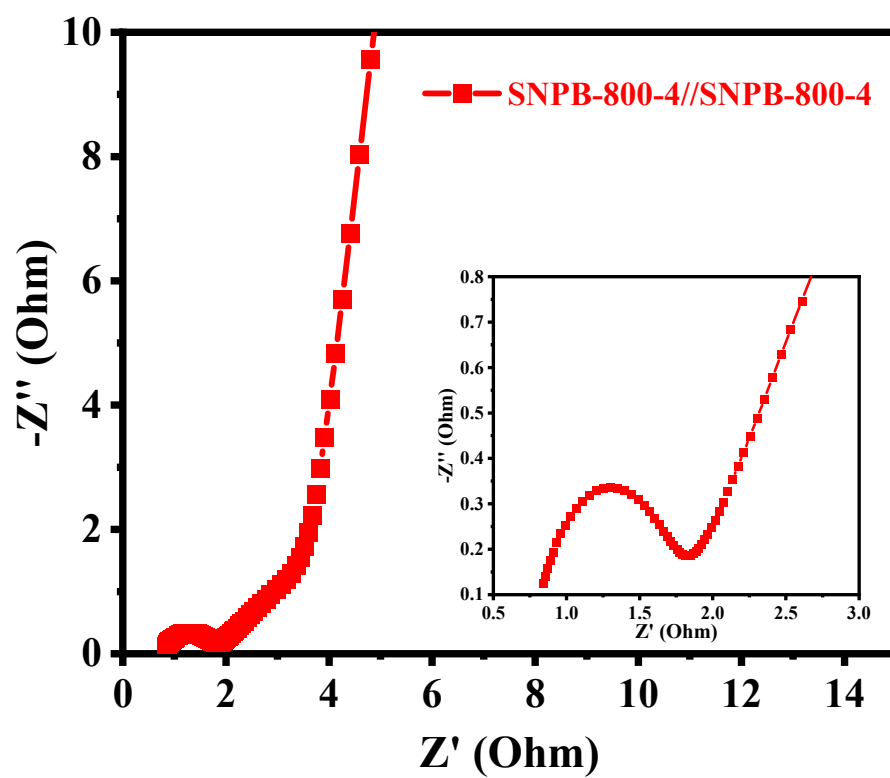

Figure S4. Nyquist plots of SNPB-800-4//SNPB-800-4.

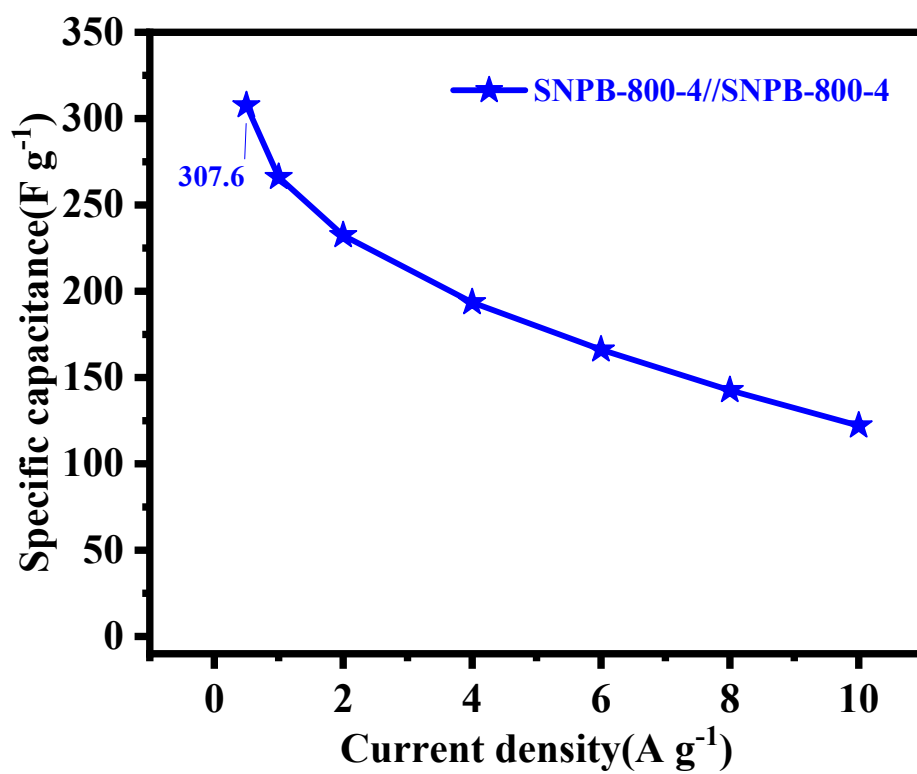

Figure S5. Specific capacitance of the SNPB-800-4//SNPB-800-4 electrode at different current densities.

**Table S1.** Element analysis of porous carbon prepared from *Spirulina* platensis.

| Sample           | C (%) | H (%) | N (%) | O (%) | C/N ratio | C/H ratio | C/O ratio | C/(O+N) ratio |
|------------------|-------|-------|-------|-------|-----------|-----------|-----------|---------------|
| <i>Spirulina</i> | 45.43 | 7.76  | 10.22 | 36.59 | 4.45      | 5.85      | 1.24      | 0.97          |
| PSB              | 59.28 | 3.84  | 10.35 | 26.53 | 5.73      | 15.44     | 2.23      | 1.61          |
| SNPB-700-4       | 72.08 | 3.21  | 3.42  | 21.29 | 21.08     | 22.45     | 3.39      | 2.92          |
| SNPB-800-1       | 68.73 | 1.09  | 1.27  | 28.91 | 54.12     | 63.06     | 2.38      | 2.28          |
| SNPB-800-2       | 75.06 | 2.91  | 1.92  | 20.11 | 39.09     | 25.79     | 3.73      | 3.41          |
| SNPB-800-4       | 80.58 | 3.09  | 2.55  | 13.78 | 31.6      | 26.08     | 5.85      | 4.93          |
| SNPB-900-4       | 81.11 | 1.21  | 2.11  | 15.57 | 38.44     | 67.03     | 5.21      | 4.59          |

Table S2. Comparison of the performance between SNPB-800-4 and commercial carbon materials.

| Electrode material    | Specific surface area<br>(m <sup>2</sup> g <sup>-1</sup> ) | Specific capacitance<br>(F g <sup>-1</sup> ) | Current density<br>(A g <sup>-1</sup> ) | Number of cycles | Cycle stability (%) | References |
|-----------------------|------------------------------------------------------------|----------------------------------------------|-----------------------------------------|------------------|---------------------|------------|
| SNPB-800-4            | 2923.7                                                     | 348.5                                        | 1                                       | 10,000           | 94.14               | — —        |
| Carbon nanotubes      | — —                                                        | 231.2                                        | 1                                       | 10,000           | 87.3                | [1]        |
| Carbon dots           | 1246                                                       | 350                                          | 1                                       | 10,000           | 92                  | [2]        |
| Carbon fiber@graphene | 2035                                                       | 552.8                                        | 0.1                                     | 200              | 90                  | [3]        |
| Porous graphene       | 2160                                                       | 210                                          | 1                                       | 5000             | 94.7                | [4]        |

**References:**

1. Zhang, Z.; Bi, L.; Tian, Q.; Gao, J.-S.; He, Y., Construction of nickel/cobalt encapsulated by N-doped carbon nanotubes for high performance supercapacitors. *Diamond and Related Materials* 2023, 110237.
2. Pu, J.; Wang, L.; Huang, J.; Chen, Q.; Jin, Y.; Chen, J., High-performance supercapacitors based on porous activated carbon derived from carbon dots by directly pyrolyzing industrial glucose. *Diamond and Related Materials* 2023, 132, 109684.
3. Xie, Q.; Bao, R.; Xie, C.; Zheng, A.; Wu, S.; Zhang, Y.; Zhang, R.; Zhao, P., Core-shell N-doped active carbon fiber@graphene composites for aqueous symmetric supercapacitors with high-energy and high-power density. *Journal of Power Sources* 2016, 317, 133-142.
4. Zheng, C.; Zhou, X.; Cao, H.; Wang, G.; Liu, Z., Synthesis of porous graphene/activated carbon composite with high packing density and large specific surface area for supercapacitor electrode material. *Journal of Power Sources* 2014, 258, 290-296.
